# Supplementary material
Source: PubMed Central journal article supplement (PMC5813492)

**a**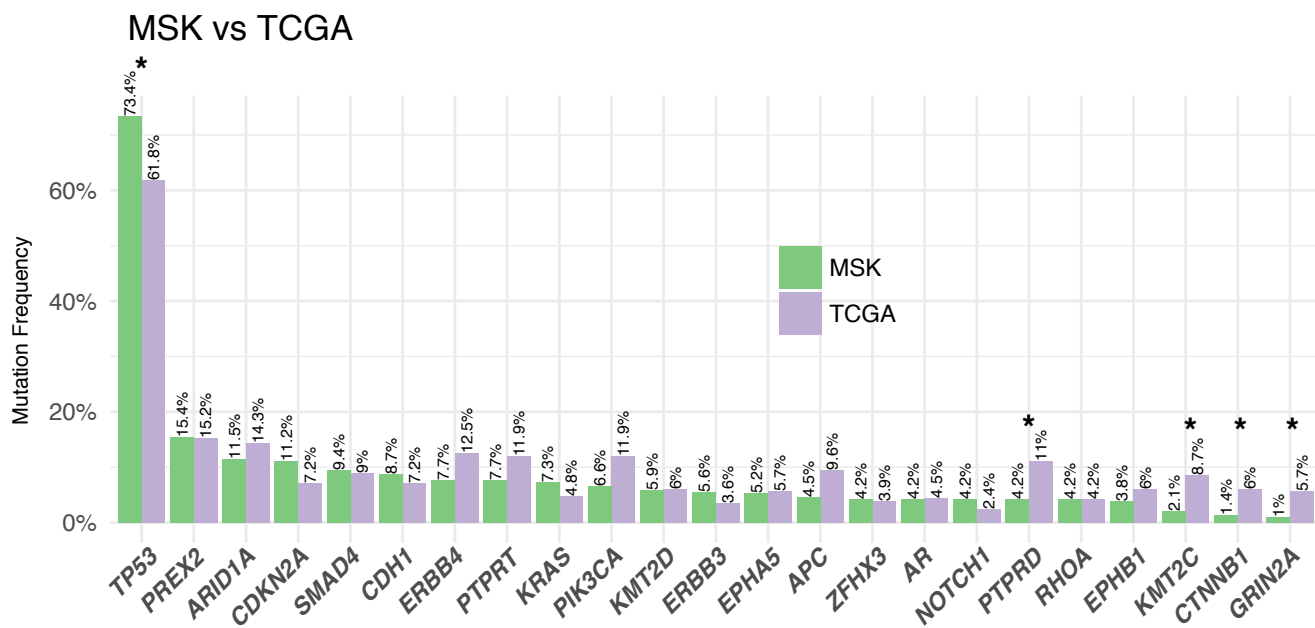**b**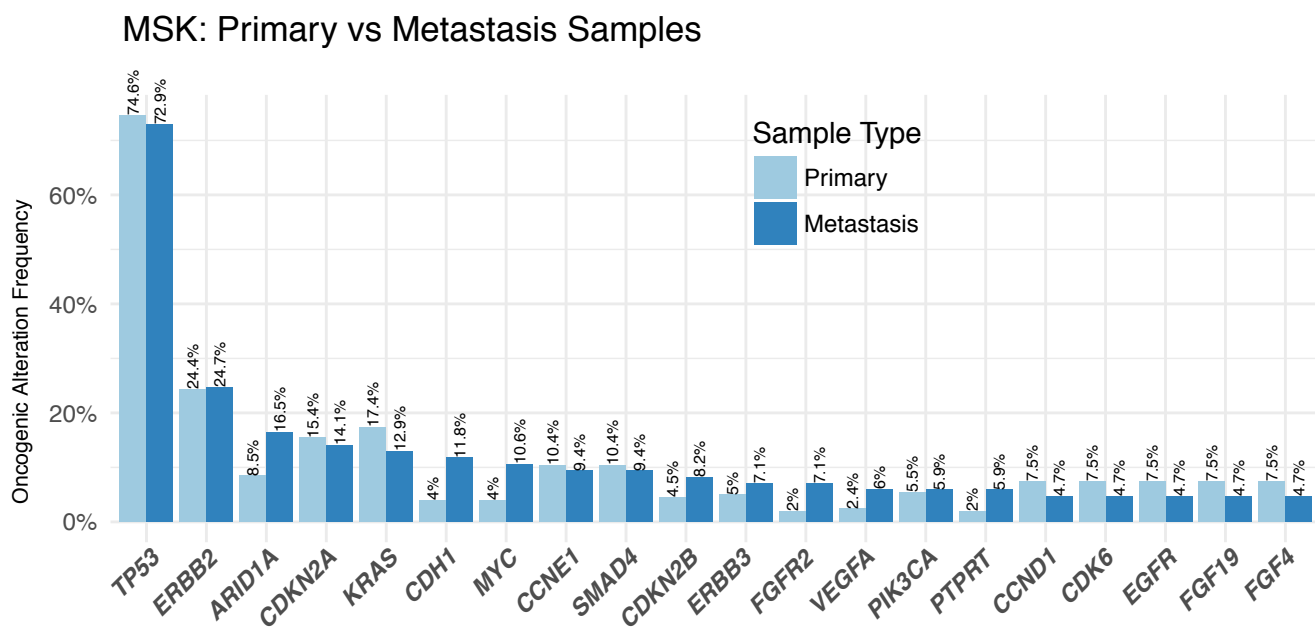

Supplementary Figure 1

Supplement: NIHMS919877-supplement-3.pdf [file NIHMS919877-supplement-3.pdf]

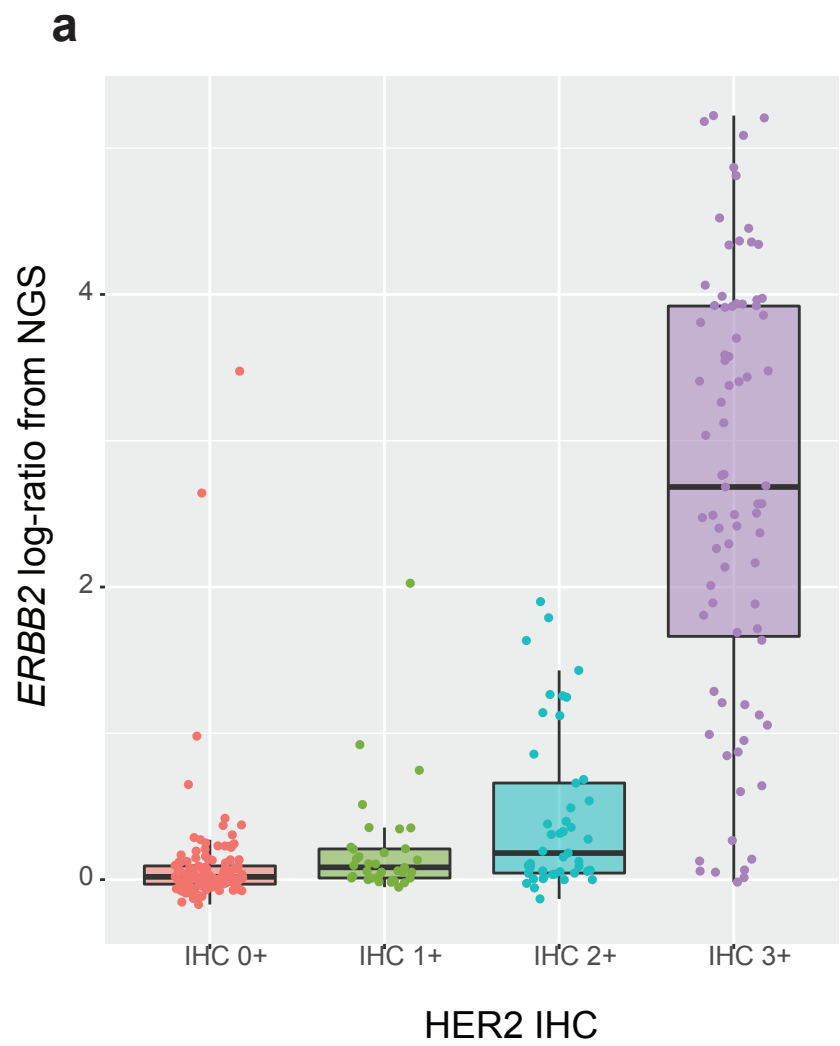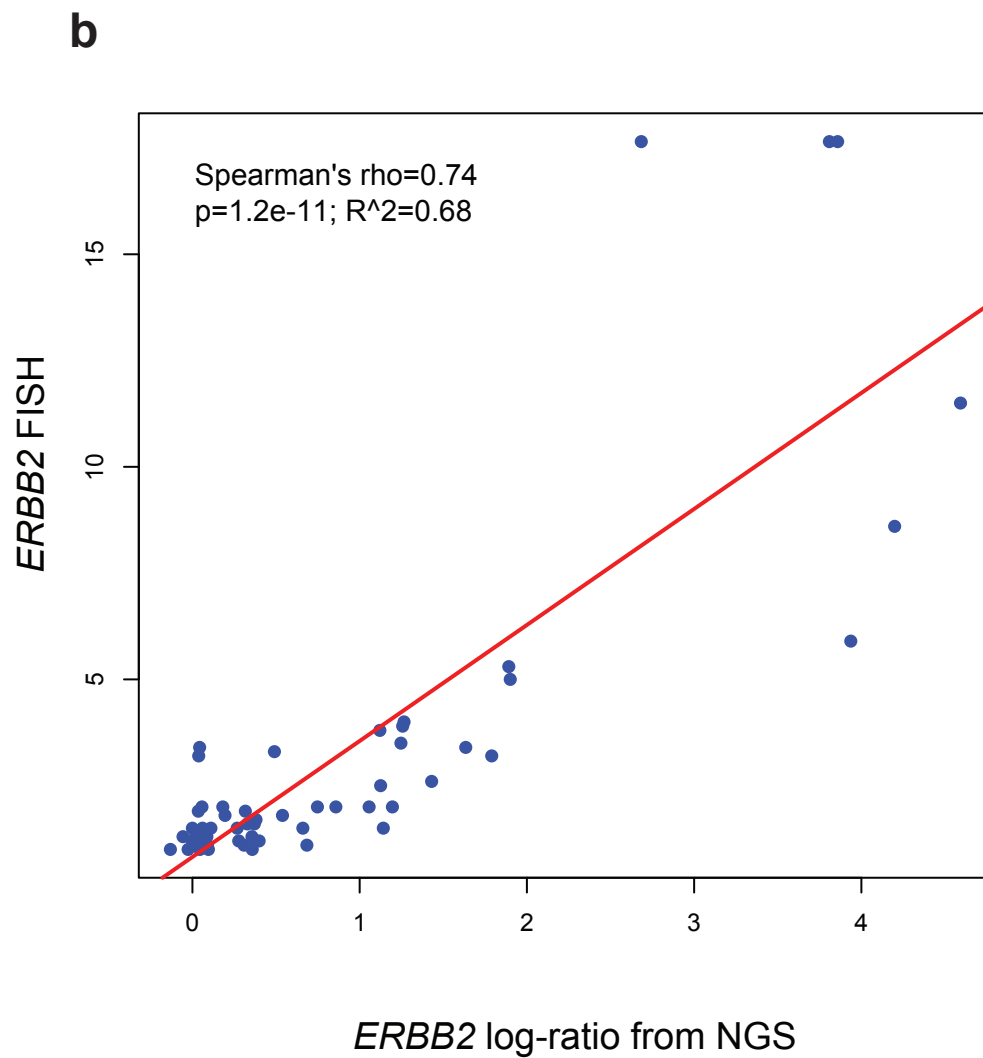

Supplementary Figure 2

Supplement: NIHMS919877-supplement-4.pdf [file NIHMS919877-supplement-4.pdf]

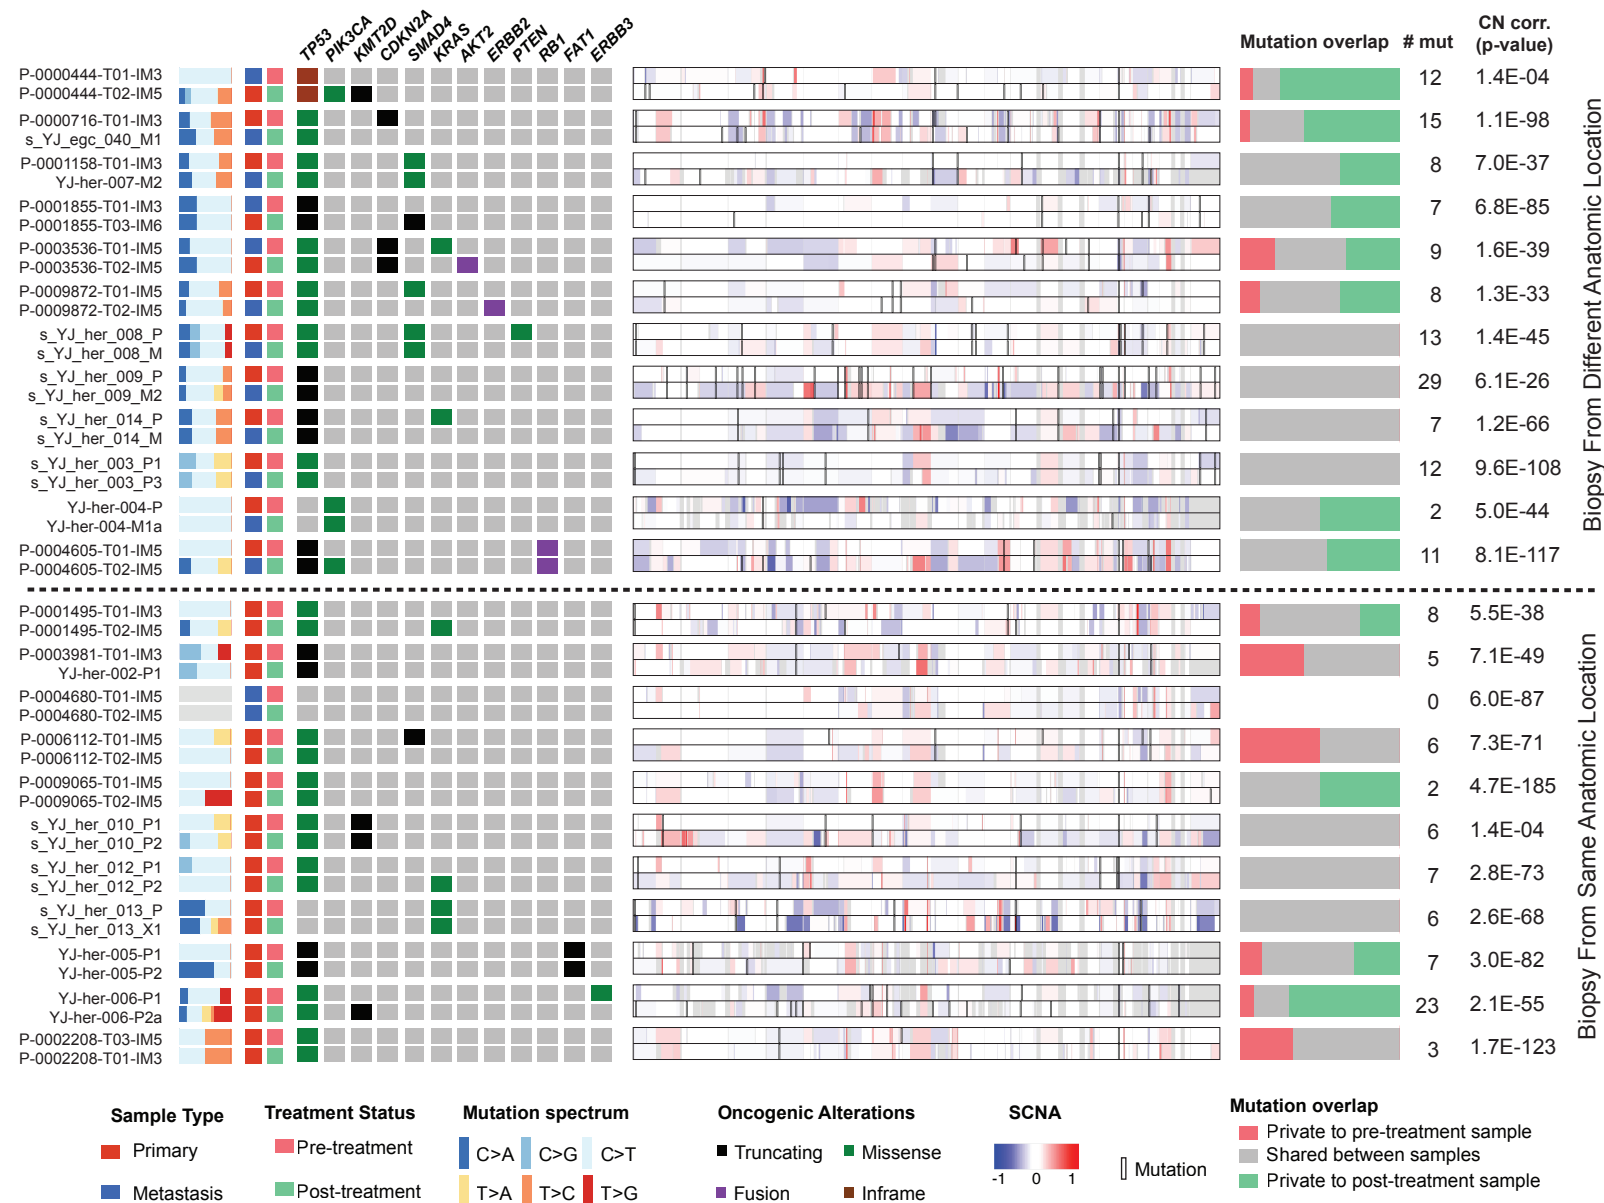

Supplementary Figure 3

Supplement: NIHMS919877-supplement-5.pdf [file NIHMS919877-supplement-5.pdf]

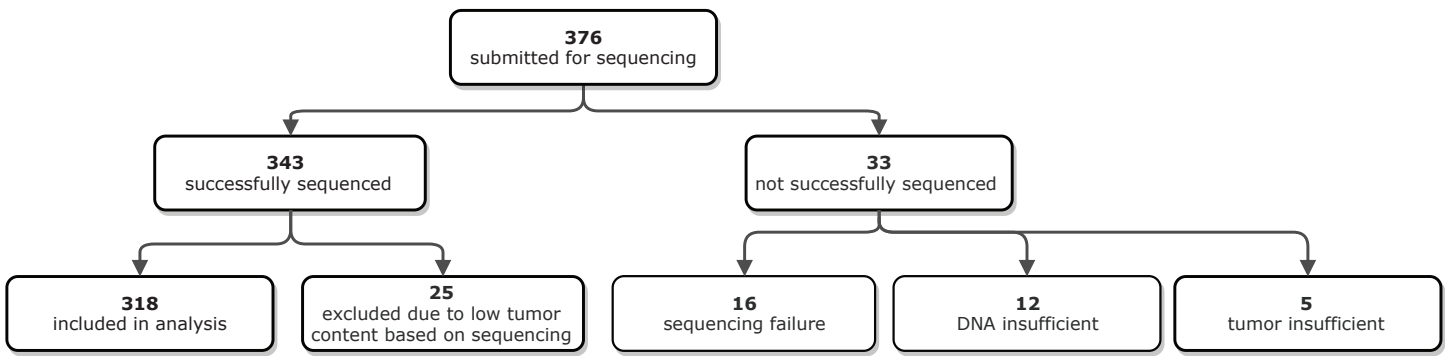

Supplementary Figure 4

Supplement: NIHMS919877-supplement-6.pdf [file NIHMS919877-supplement-6.pdf]
